# Supplementary material for: Targeting SARS-CoV-2 Variants with Nucleic Acid Therapeutic Nanoparticle Conjugates
Source: MDPI journal article supplement (doi:10.3390/ph14101012), 2021-10-01
Supplement: s1 [file s1]

**Table S1.** Partial homopurine and homopyrimidine sites within the SARS-CoV-2 genome.

| Sequence Type<br>(base #)       | Target Sequence<br>(5'-3')       | Sequence<br>Length | Number of<br>Mutations |
|---------------------------------|----------------------------------|--------------------|------------------------|
| Homopurine<br>(1801-1821)       | AAAAGGAAAAG <u>CT</u> AAAAAAGG   | 19 nt              | 2                      |
| Homopurine<br>(13610-13625)     | AAGAAAAGGAC <u>G</u> GAAGA       | 15 nt              | 1                      |
| Homopurine<br>(29378-29399)     | AAAAAGGAC <u>A</u> AAAAAGAAGAAGG | 21 nt              | 1                      |
| Homopyrimidine<br>(21725-21742) | TTCTT <u>A</u> CCTTTCTTTTCC      | 17 nt              | 1                      |
| Homopyrimidine<br>(25700-25717) | CCCCTTTTCTCT <u>A</u> TCTTT      | 17 nt              | 1                      |
| Homopyrimidine<br>(26296-26313) | CTTCTTTTCTT <u>G</u> CTTTC       | 17 nt              | 1                      |
